# Supplementary material
Source: PubMed Central journal article supplement (PMC4573903)
Supplement: NIHMS712563-supplement.pdf [file NIHMS712563-supplement.pdf]

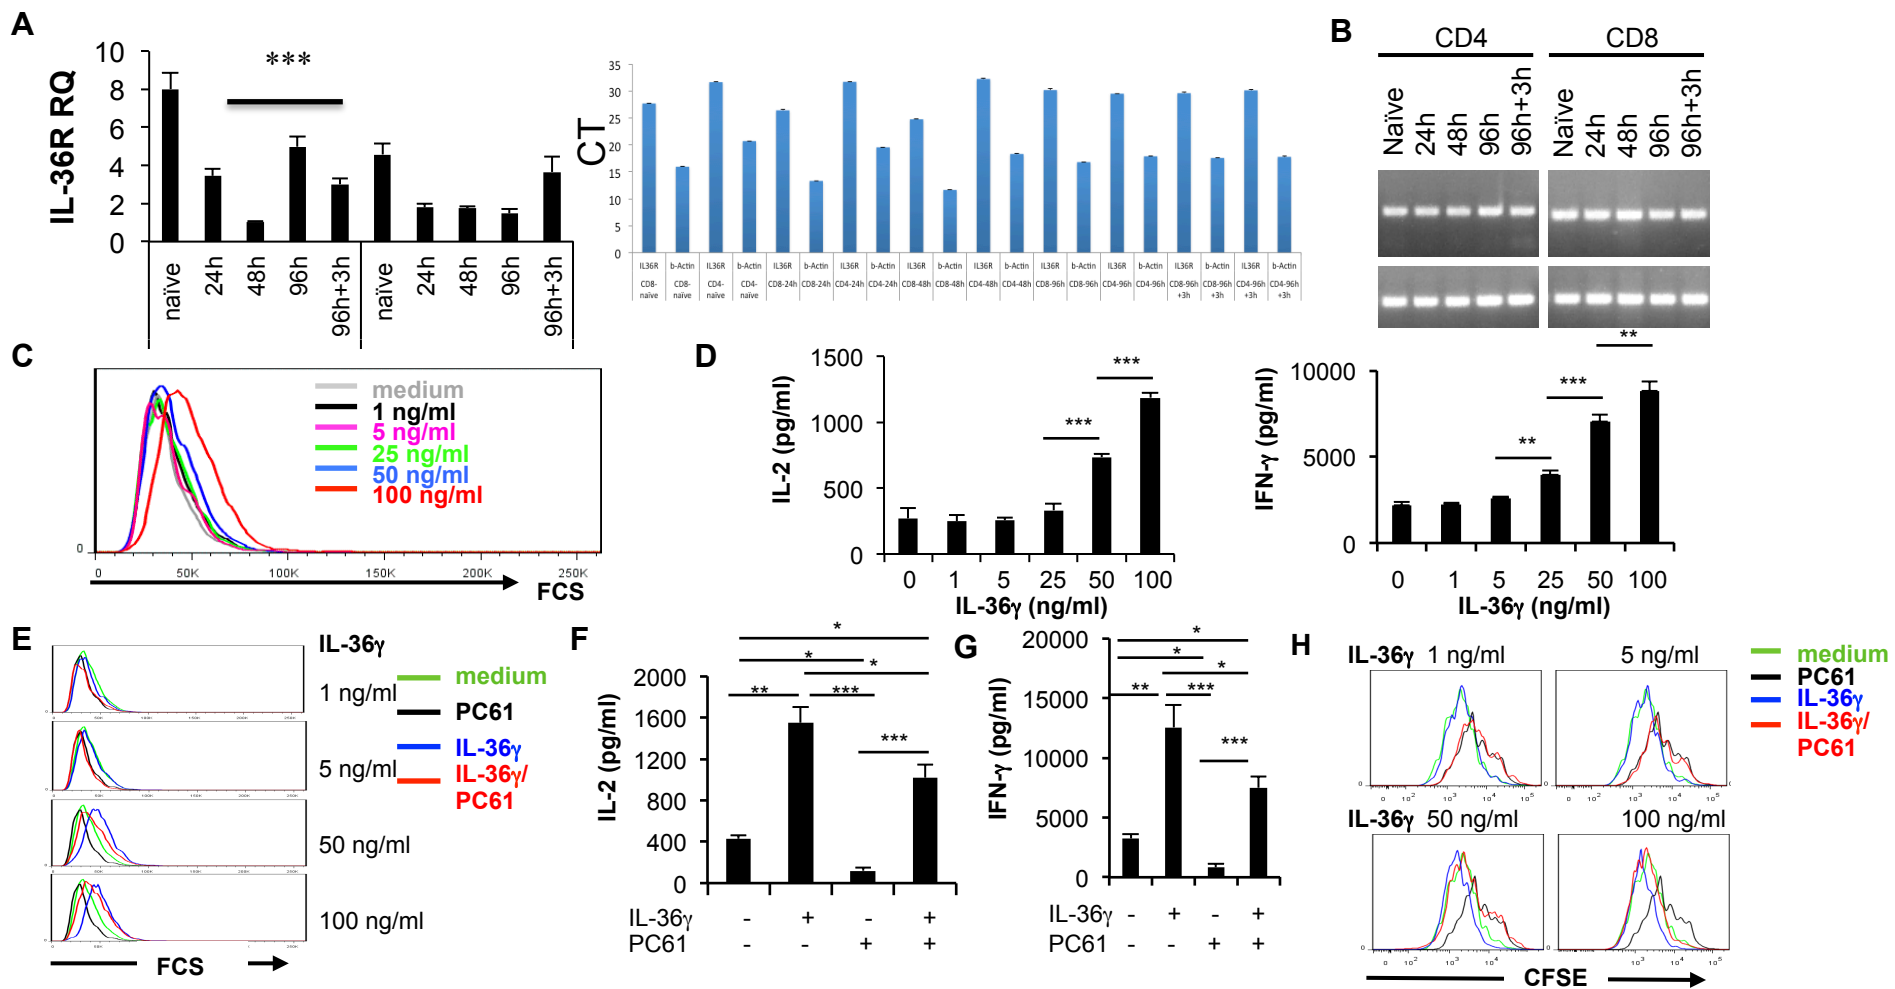

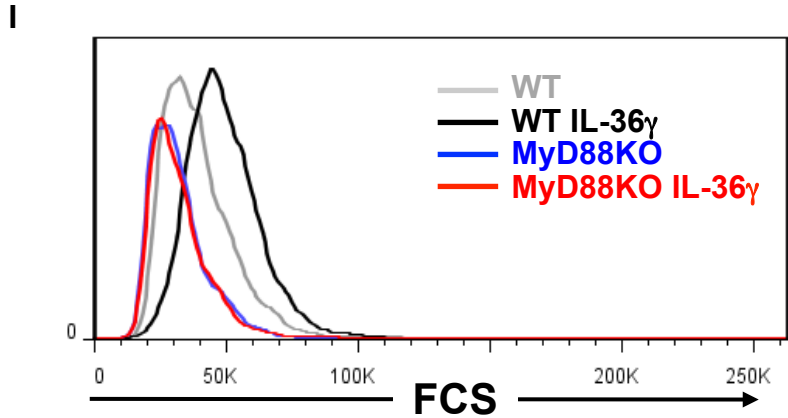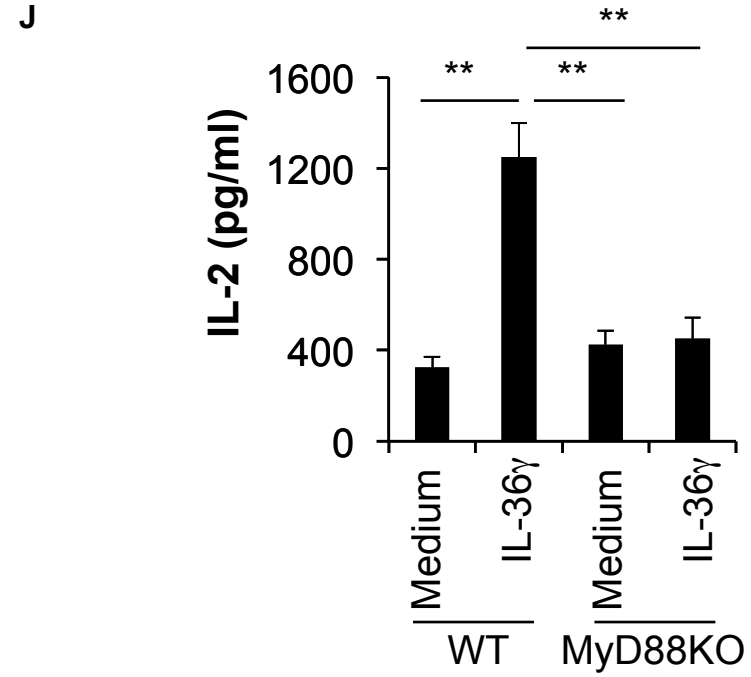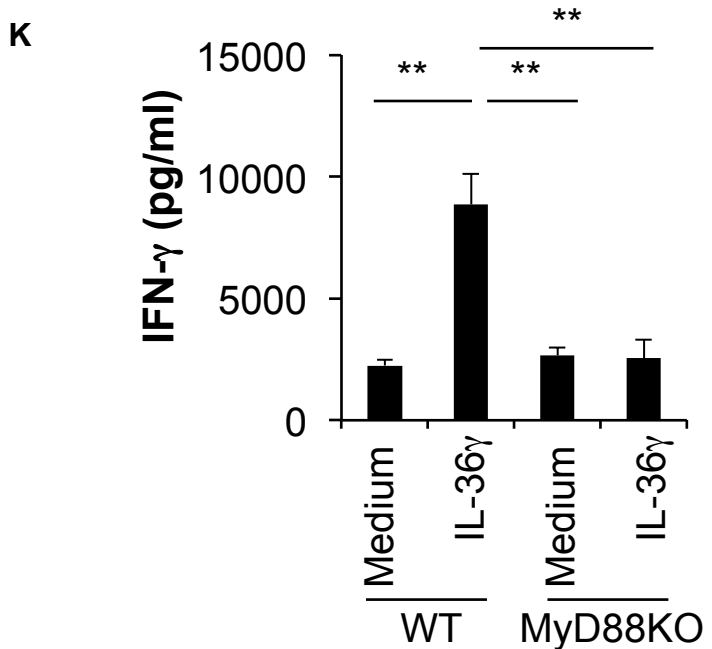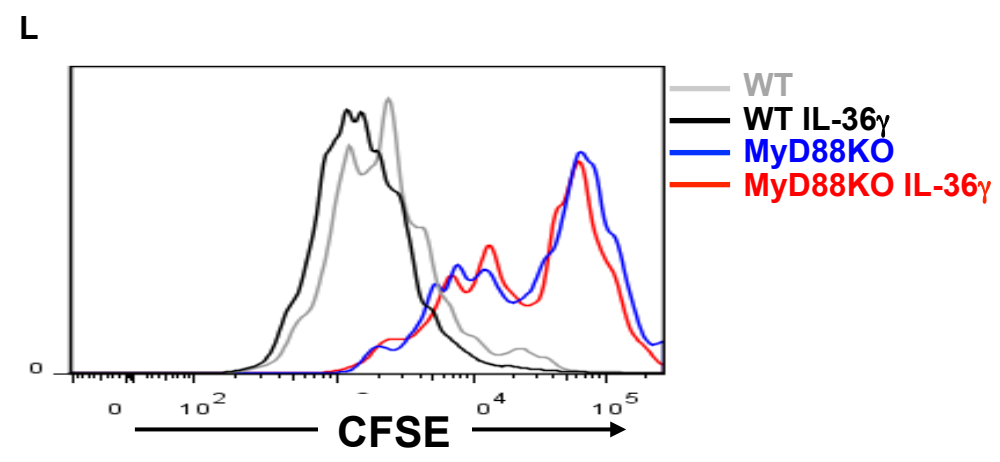

**Figure S1 related to figure 1. IL-36 $\gamma$  effect on CD8<sup>+</sup> T cells.** (A) Naïve CD4<sup>+</sup> and CD8<sup>+</sup> T (CD44<sup>-</sup> CD62L<sup>+</sup>) cells were purified from spleen cells of C57BL/6 mice by FACS sorting. T cells were then stimulated in the Th1 condition for the time indicated. (96h +3h indicates that T cells were cultured for 96 h and subsequently re-stimulated with anti-CD3 for 3 h). Total RNA was subjected quantitative RT-PCR analysis (A) and RT-PCR (B) for IL-36R. RQ (relative quantification values) were calculated based on  $\Delta\Delta$ CT method. (C and D) Naïve pmel-1 CD8<sup>+</sup> T cells were stimulated with plate-bound 5  $\mu$ g/ml CD3 and 2.5  $\mu$ g/ml CD28 mAbs in the presence or absence of IL-36 $\gamma$  at various concentrations as indicated. (C) Cell sizes (FSC) were determined by flow cytometry at 72 h.(D) The level of IL-2 and IFN- $\gamma$  at 24 h after stimulation was measured by ELISA. (E to H) Naïve CD8<sup>+</sup> T cells were stimulated with plate-bound 5  $\mu$ g/ml CD3 and 2.5  $\mu$ g/ml CD28 mAbs in the presence or absence of mouse IL-36 $\gamma$  at various concentrations as indicated. CD25 mAbs (clone PC61, 20  $\mu$ g/ml) were added to cultures to block IL-2 signaling. (E) Cell sizes (FSC) were determined by flow cytometry at 72 h. IL-2 (F) or IFN- $\gamma$  (G) secretion was determined by ELISA at 24 h. (H) Proliferation was determined by the CFSE-dilution assay at 72 h. Data are shown as mean  $\pm$  SEM. \*\*\* p < 0.001, \*\* p <0.01, \* p<0.05. two-tailed unpaired Student's t-test. (I- L) Naïve CD8<sup>+</sup> T cells were isolated from WT or Myd88<sup>-/-</sup> B6 mice. They were subsequently stimulated with plate-bound 5  $\mu$ g/ml CD3 and 2.5  $\mu$ g/ml CD28 mAbs in the presence or absence of 100 ng/ml IL-36 $\gamma$  for 72 h. (I) Cell sizes (FSC) were determined by flow cytometry. (J) IL-2 and (K) IFN- $\gamma$  production was determined by ELISA. Data are shown as mean  $\pm$  SEM. \*\* p <0.01 two-tailed unpaired Student's t-test. (L) Proliferation was determined by the CFSE-dilution assay.

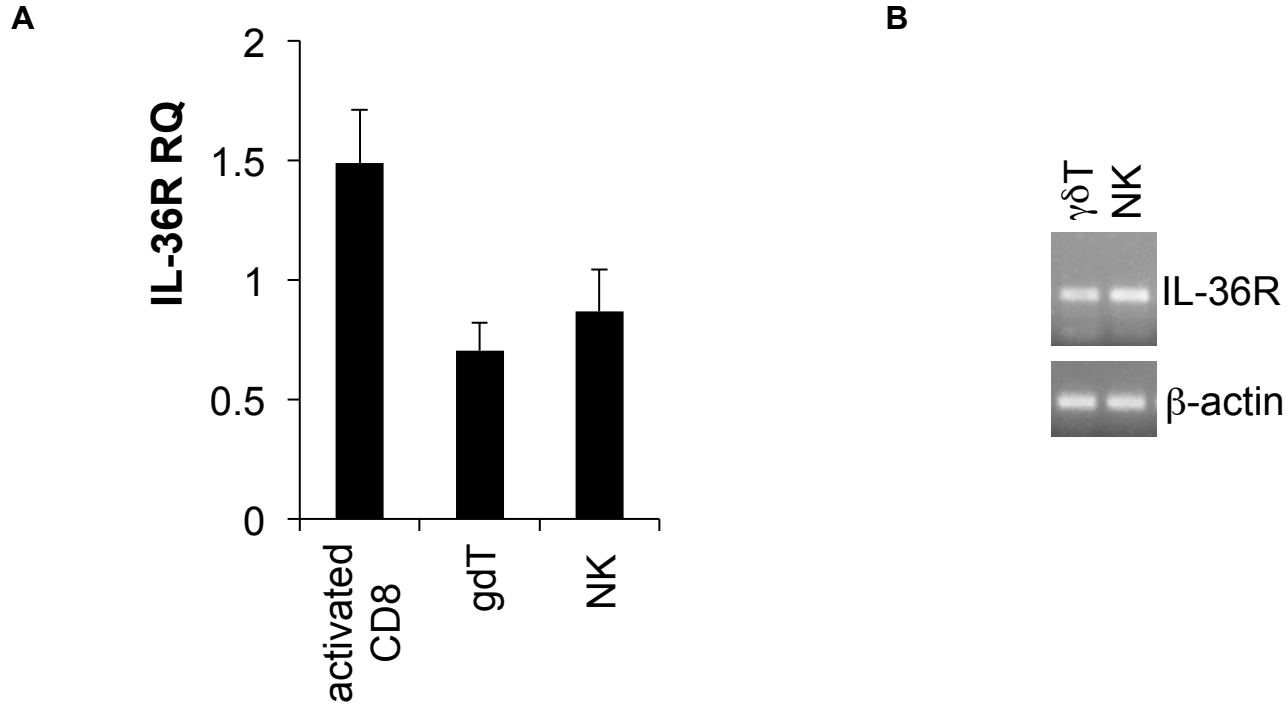

**Figure S2 related to figure 2. IL-36R is expressed in NK and  $\gamma\delta$  T cells.** Naïve CD8<sup>+</sup> T (CD44<sup>-</sup> CD62L<sup>+</sup>), NK (DX5<sup>+</sup>) and  $\gamma\delta$  T cells were purified from spleen cells of C57BL/6 mice by FACS sorting. T cells were then stimulated in the Th1 condition for 96 h. NK cells were cultured in the presence of IL-2 for 72 h and  $\gamma\delta$  T cells were stimulated with CD3 mAbs and IL-2 for 72 h. Total RNA was purified and subjected to (A) quantitative RT-PCR analysis for IL-36R. RQ (relative quantification values) were calculated based on  $\Delta\Delta$ CT method. Data are shown as mean  $\pm$  SEM. Data are shown as mean  $\pm$  SEM. (B) RT-PCR analysis.

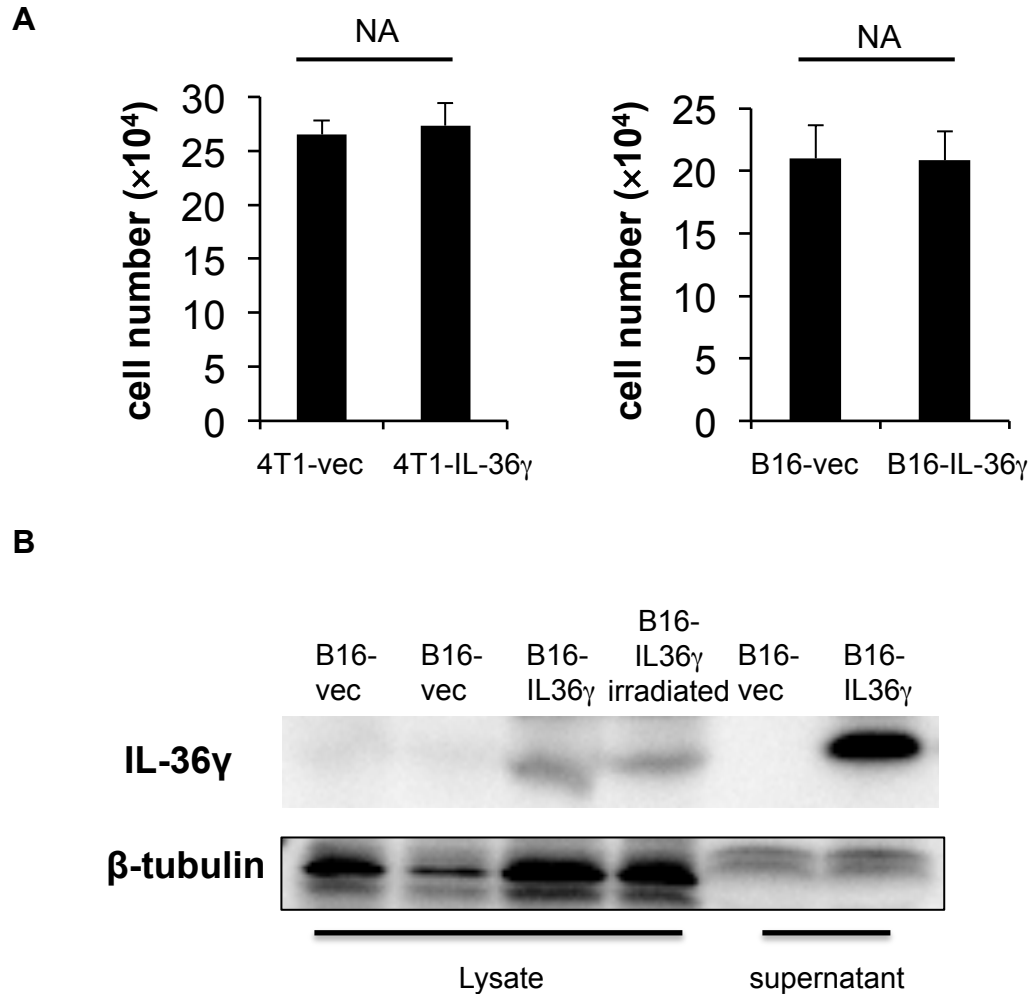

**Figure S3 related to figure 3. Analysis of IL36 $\gamma$ -expressing cell lines.**

(A) The growth of IL-36 $\gamma$  transfectants were comparable to the control cells.  $4 \times 10^4$  4T1-vec, 4T1-IL-36 $\gamma$  B16-vec or B16-IL-36 $\gamma$ , cells were seeded into 24 wells with triplicates. The cells were cultured for 2 days, the number of live cells was determined by live cell counting after cells were stained with Trypan blue. Data (mean  $\pm$ SEM) are representative of three independent experiments. (B) Detection of IL-36 $\gamma$  protein by Western blot. Supernatants were harvested from B16-vec or B16-IL-36 $\gamma$  cell culture and concentrated 10 times. Cell lysates were made from B16-vec or B16-IL-36 $\gamma$  cells. Western blot was performed using rabbit anti-IL1F9 antibody ((aa5-149) LS-C294790; LifeSpan Biosciences, Inc.)



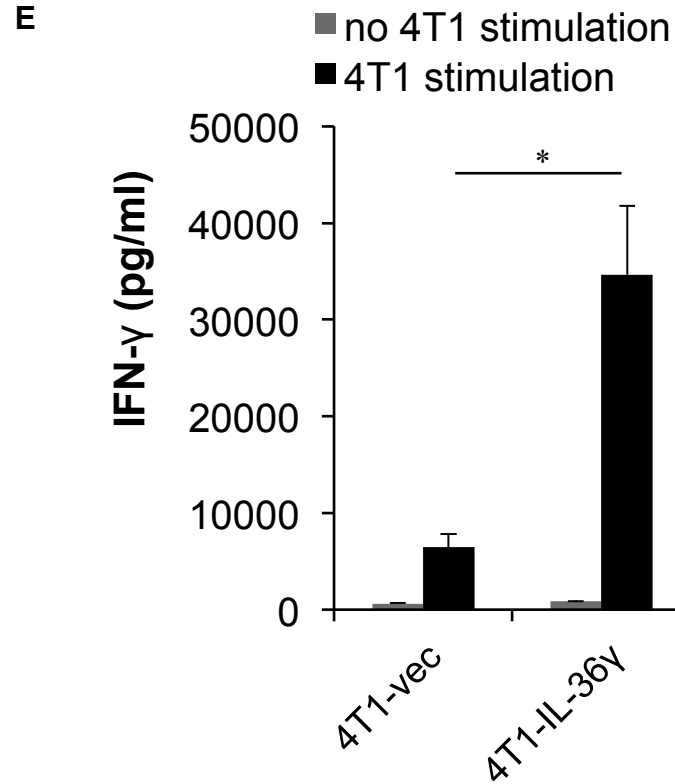

**Figure S4 related to Figure 4. Tumoral expression of IL-36 $\gamma$  influence antitumor immune responses.**  $1 \times 10^5$  B16-vector or B16-IL-36 $\gamma$  cells were injected i.d. into B6 mice. On day 24, tumors were resected and processed to generate single cell suspensions. (A) Representative flow cytometric plots and percentages of CD8<sup>+</sup> Ki67<sup>+</sup> populations from the CD8<sup>+</sup> in tumor microenvironment are shown. (B) Representative flow cytometric plots and percentages of CD4<sup>+</sup> and Treg cells in the tumor microenvironment are shown. (C) Representative flow cytometric analysis of CD11b<sup>+</sup> sub-populations and percentages of CD11b<sup>+</sup> subpopulations of CD45<sup>+</sup> immune cells and percentages of MHC class II expression on three CD11b<sup>+</sup> sub-populations. (D) Tumors were resected and total RNA was extracted and subjected to RT-QPCR analysis. RQ (relative quantification values) were calculated based on  $\Delta\Delta CT$  method. Results are shown as mean  $\pm$  SEM of four independent experiments. One tumor was used in each experiment. \* $p < 0.05$  and \*\*  $p < 0.01$ , two-tailed unpaired Student's t-test. (E) Tumor antigen-specific CD8<sup>+</sup> T cell responses were enhanced by IL-36 $\gamma$ .  $1 \times 10^5$  4T1-vector or 4T1-IL-36 $\gamma$  cells were injected into the mammary fat pad of BALB/c mice. 30 days after inoculation, CD8<sup>+</sup> T cells were purified from the spleens of these mice and re-stimulated with irradiated 4T1 cells for 72h in the presence of irradiated APC. The level of IFN- $\gamma$  was then measured by ELISA. Results are shown as mean  $\pm$  SEM of three independent experiments. One pair of mice were used in each experiment. \* $p < 0.05$ , two-tailed unpaired Student's t-test.

A

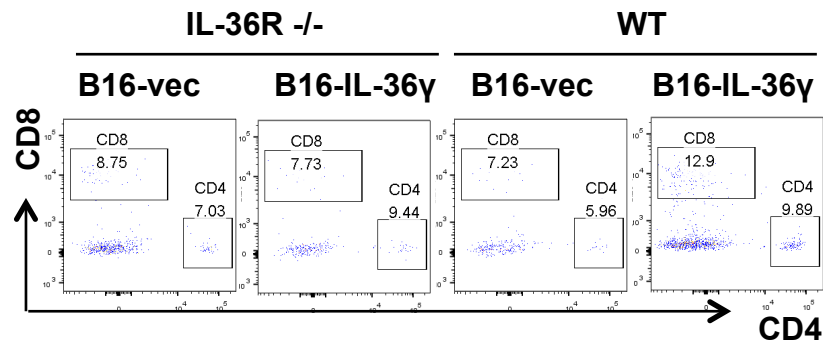

B

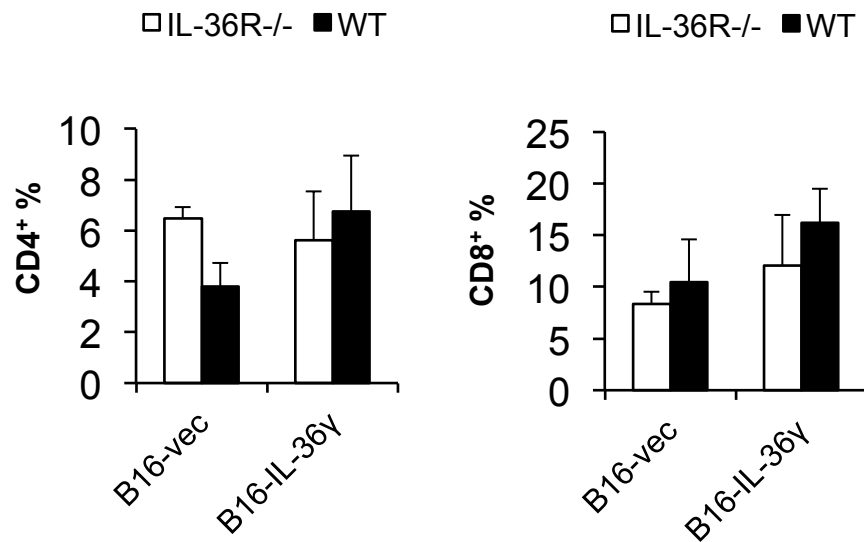

C

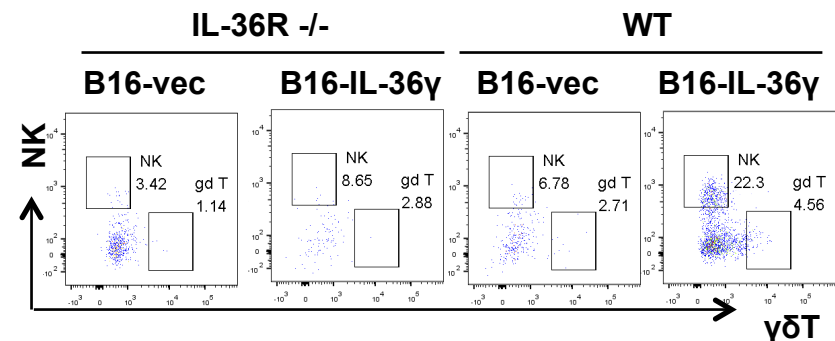

D

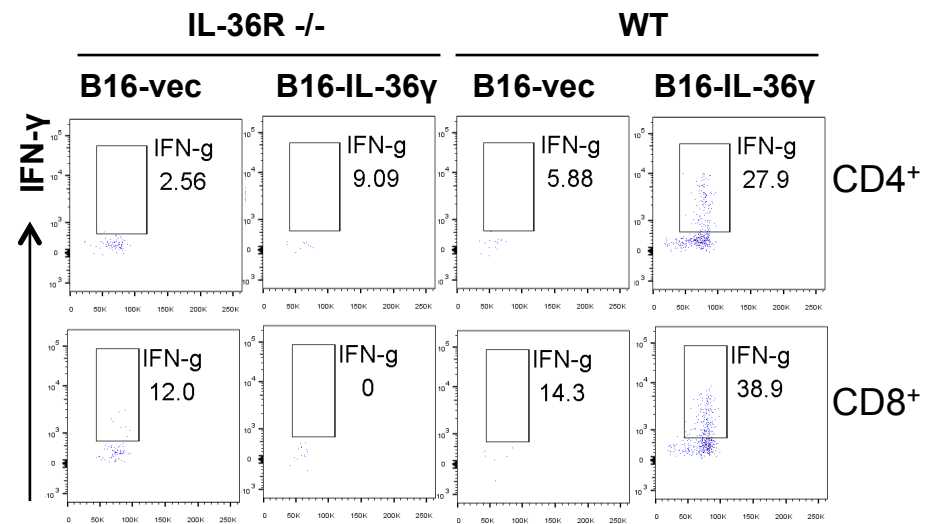

**Figure S5 related to figure 5. Analysis of TIL in WT and IL-36R<sup>-/-</sup> mice.**  $1 \times 10^5$  B16-vector (B16-vec) or B16-IL-36 $\gamma$  cells were injected intradermally into WT and IL-36R<sup>-/-</sup> mice. The tumors were resected on day 17 and TIL were subjected to the flow cytometric analysis. (A) Representative flow cytometric analysis of CD4, CD8 T cells among CD45<sup>+</sup> TIL. (B) Percentages of the CD4<sup>+</sup> and CD8<sup>+</sup> T cells within the CD45<sup>+</sup> TIL. (C) Representative flow cytometric analysis of NK and  $\gamma\delta$  T cells among CD45<sup>+</sup> TIL. (D) Representative flow cytometric analysis of IFN- $\gamma$ <sup>+</sup> T cells among CD4<sup>+</sup> and CD8<sup>+</sup> TIL.



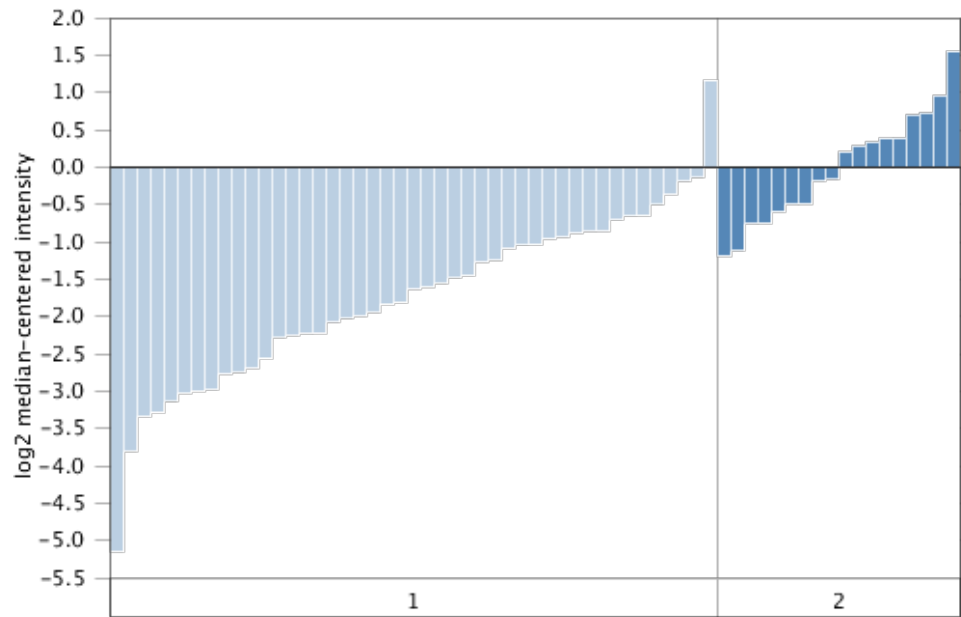

1. Cutaneous Melanoma (45)
2. Melanoma Precursor (18)

**Figure S6 related to figure 8. IL-36 $\gamma$  expression in melanoma and melanoma precursor.** The data is generated after search oncomine database ([www.oncomine.com](http://www.oncomine.com)) (Rhodes et al., 2004). The result is based on Talantov D et al's paper titled: Novel genes associated with malignant melanoma but not benign melanocytic lesions (Talantov et al., 2005).

## Supplemental experimental procedures:

### List of RT-QPCR primers

| Genes          | Forward                | Reverse                   |
|----------------|------------------------|---------------------------|
| IL-36R         | AAACACCTAGCAAAAGCCCAG  | AGACTGCCCGATTTTCCTATG     |
| IFN- $\gamma$  | CCTGCGGCCTAGCTCTGAG    | GCCATGAGGAAGAGCTGCA       |
| IL-12p35       | CAATCACGCTACCTCCTCTTTT | CAGTGCAGGAATAATGTTTC      |
| Granzyme B     | CCACTCTCGACCCTACATGG   | GGCCCCCAAAGTGACATTTATT    |
| IL-17 $\alpha$ | CTCCAGAAGGCCCTCAGACTAC | GGGTCTTCATTGCGGTGG        |
| IL-1 $\beta$   | CTGAACTCAACTGTGAAATG   | CGAGATTTGAAGCTGGATGC      |
| IL-23p19       | TGGCATCGAGAAACTGTGAGA  | TCAGTTCGTATTGGTAGTCCTGTTA |
| TNF $\alpha$   | ATGAGCACAGAAAGCATGATC  | TACAGGCTTGTCACCTCGAATT    |
| IL-10          | TGTCAAATTCATTCATGGCCT  | ATCGATTTCTCCCCTGTGAA      |
| $\beta$ -actin | GAAATCGTGCGTGACATCAA   | TGTAGTTTCATGGATGCCACAG    |

# Supplemental reference

Rhodes, D. R., Yu, J., Shanker, K., Deshpande, N., Varambally, R., Ghosh, D., Barrette, T., Pandey, A., and Chinnaiyan, A. M. (2004). ONCOMINE: a cancer microarray database and integrated data-mining platform. *Neoplasia* (New York, NY) 6, 1-6.

Talantov, D., Mazumder, A., Yu, J. X., Briggs, T., Jiang, Y., Backus, J., Atkins, D., and Wang, Y. (2005). Novel genes associated with malignant melanoma but not benign melanocytic lesions. *Clinical cancer research : an official journal of the American Association for Cancer Research* 11, 7234-7242.
